# Supplementary material for: Nanoparticles with rough surface improve the therapeutic effect of photothermal immunotherapy against melanoma
Source: PubMed Central journal article supplement — Acta Pharm Sin B. 2021 Dec 1;12(6):2934–49. doi: 10.1016/j.apsb.2021.11.020 (PMC9214318; doi:10.1016/j.apsb.2021.11.020), 2021-12-01
Supplement: mmc1.pdf [file mmc1.pdf]

## **Supporting Information for**

### **ORIGINAL ARTICLE**

#### **Nanoparticles with rough surface improve the therapeutic effect of photothermal immunotherapy against melanoma**

**Jiao Xue, Yining Zhu, Shuting Bai, Chunting He, Guangsheng Du, Yuandong Zhang, Yao Zhong, Wenfei Chen, Hairui Wang, Xun Sun\***

*Key Laboratory of Drug-Targeting and Drug Delivery System of the Education Ministry and Sichuan Province, Sichuan Engineering Laboratory for Plant-Sourced Drug and Sichuan Research Center for Drug Precision Industrial Technology, West China School of Pharmacy, Sichuan University, Chengdu 610041, China*

Received 15 October 2021; received in revised form 9 November 2021; accepted 20 November 2021

\*Corresponding author. Tel./fax: +86 28 85502307.

E-mail address: sunxun@scu.edu.cn (Xun Sun).

|                                                                                                                             |    |
|-----------------------------------------------------------------------------------------------------------------------------|----|
| <b>Table S1</b> The roughness of PNs-S, PSNs-S and PSNs-R .....                                                             | 3  |
| <b>Figure S1</b> The appearance of synthesized nanoparticles.....                                                           | 4  |
| <b>Figure S2</b> TEM images of SNs-S, SNs-R and JQ-1@PSNs-R .....                                                           | 5  |
| <b>Figure S3</b> SEM images of PNs-S, PSN-S, PSN-R .....                                                                    | 6  |
| <b>Figure S4</b> Mesopores of nanoparticles .....                                                                           | 7  |
| <b>Figure S5</b> Stability of JQ-1@PSNs-R.....                                                                              | 8  |
| <b>Figure S6</b> The uptake of PSNs-R and PSNs-S .....                                                                      | 9  |
| <b>Figure S7</b> Photothermal cytotoxicity of JQ-1@PSNs-R .....                                                             | 10 |
| <b>Figure S8</b> JQ-1@PSNs-R inhibiting the expression of PD-L1 in BMDCs .....                                              | 11 |
| <b>Figure S9</b> The antibodies in serum after JQ-1@PSNs-mediated photothermal therapy .....                                | 12 |
| <b>Figure S10</b> The expression of PD-L1 in tumor cells and DCs after JQ-1@PSNs-mediated photothermal therapy .....        | 13 |
| <b>Figure S11</b> The proportions of CD4 and CD8 T cells in tumor sites after JQ-1@PSNs-mediated photothermal therapy ..... | 14 |
| <b>Figure S12</b> Histopathology examination after JQ-1@PSNs-mediated photothermal therapy .....                            | 15 |
| <b>Figure S13</b> Mice weight after JQ-1@PSNs-mediated photothermal therapy.....                                            | 16 |
| <b>Figure S14</b> Analysis of cells in the blood after JQ-1@PSNs-mediated photothermal therapy. ....                        | 17 |
| <b>Figure S15</b> Inhibition of primary and distant melanoma growth in a model of distant tumor metastasis .....            | 18 |

## Supporting Tables

**Table S1** The roughness of PNs-S, PSNs-S and PSNs-R.

| Sample | Ra (nm) | Rq (nm) |
|--------|---------|---------|
| PNs-S  | 5.988   | 7.116   |
| PSNs-S | 5.818   | 6.727   |
| PSNs-R | 14.880  | 17.600  |

Ra: average roughness.

Rq: root mean square roughness.

## Supporting Figures

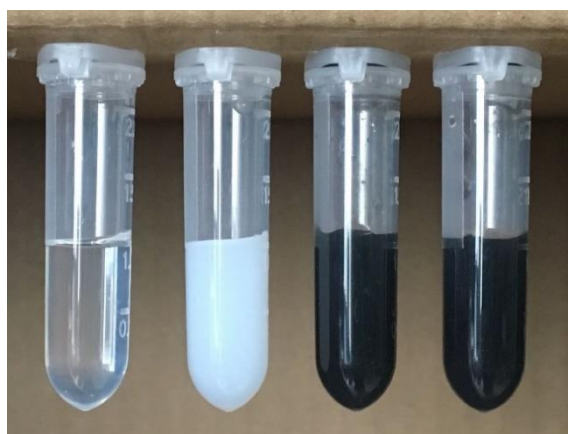

**Figure S1** The appearance of synthesized nanoparticles. From left to right are PBS, SNs-R, PSNs-R and JQ-1@PSNs-R.

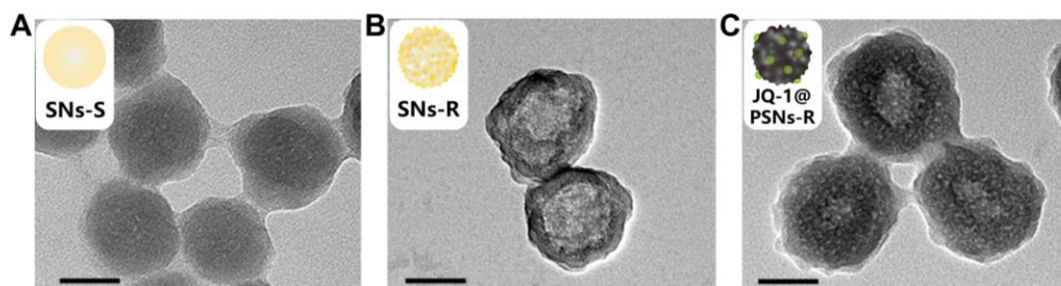

**Figure S2** TEM images of (A) SNs-S, (B) SNs-R, and (C) JQ-1@PSNs-R. Transmission electron microscopy (Tecnai G2 F20 S-TWIN, FEI, Hillsboro, OH, USA) was used to characterize the morphology and structure of the nanoparticles. Scale bar = 100 nm.

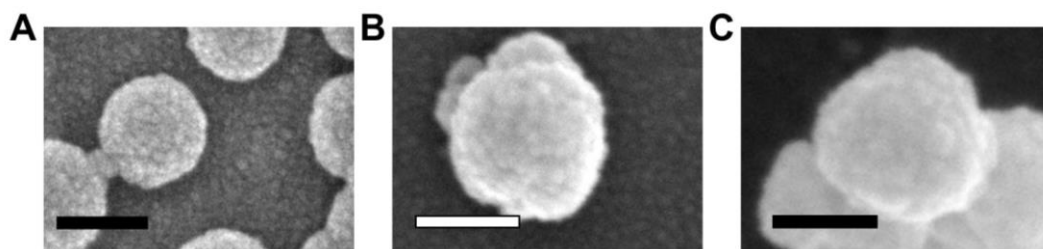

**Figure S3** SEM images of (A) PN<sub>s</sub>-S, (B) PSN-S, and (C) PSN-R. A scanning electron microscope (Apreo S, Thermo Fisher Scientific, Waltham, MA, USA) was used to observe the surface of nanoparticles. Scale bar = 100 nm.

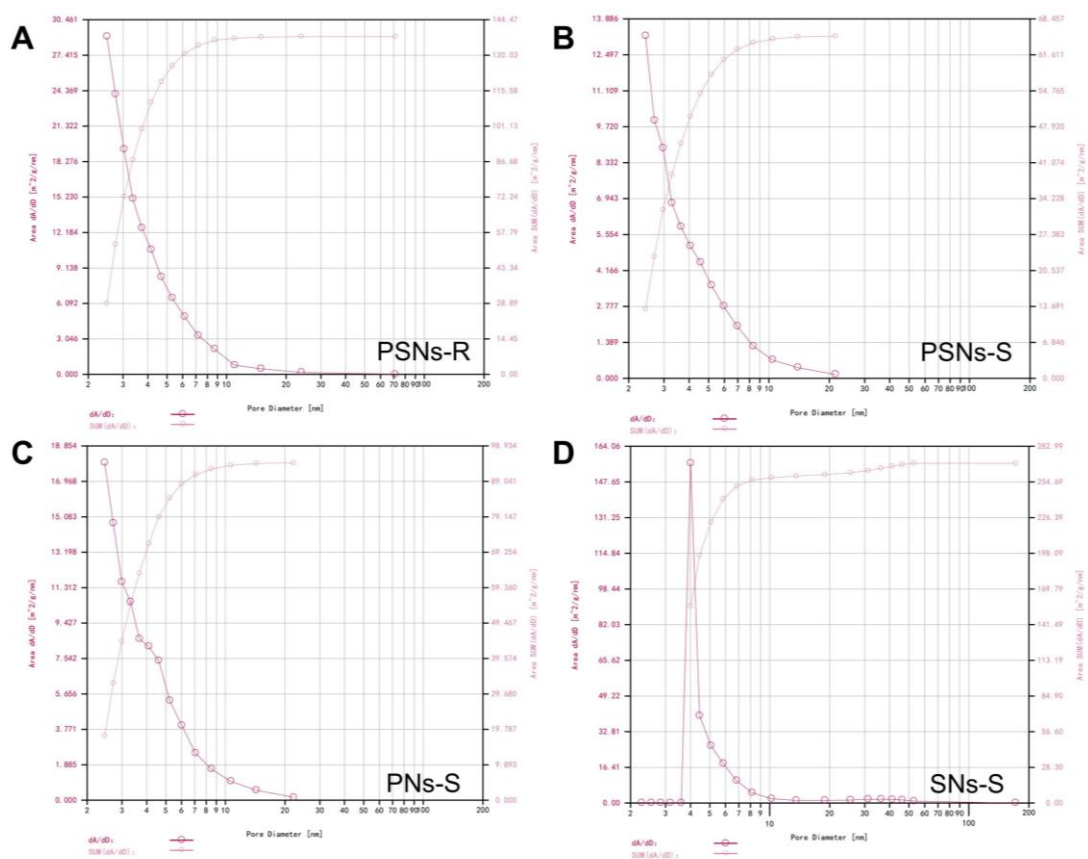

**Figure S4** Mesopores of (A) PSNs-R, (B) PSNs-S, (C) PNs-S, and (D) SNs-R. The mesopore size of SNs-R was measured as 4.01 nm by nitrogen adsorption-desorption tests. PSNs-R, PSNs-S and PNs-S showed no mesopore on the surface.

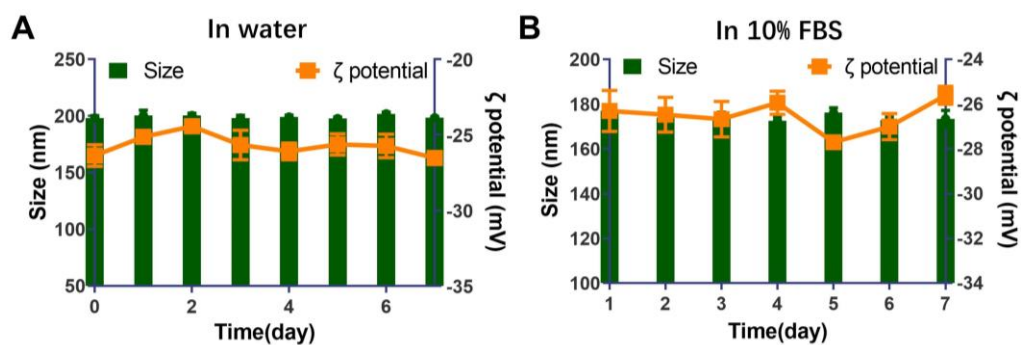

**Figure S5** Stability of JQ-1@PSNs-R. JQ-1@PSNs-R were dispersed (A) in water or (B) in 10% FBS for one week. The size and  $\zeta$  potential of JQ-1@PSNs-R were measured by dynamic light scattering (Zetasizer ZEN3690, Malvern, UK). Results showed that the JQ-1@PSNs-R exhibited a good stability. Data were mean  $\pm$  SEM,  $n = 3$ .



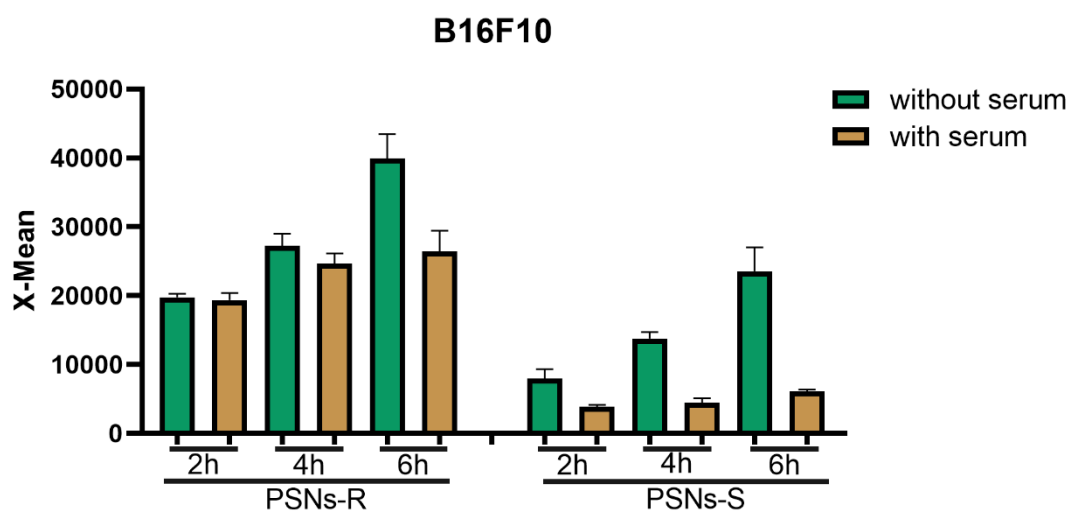

**Figure S6** The uptake of PSNs-R and PSNs-S on B16F10 cells in the medium with or without serum of different uptake time. In the presence of serum, the uptake of PSNs-R and PSNs-S were both decreased. Data were mean  $\pm$  SEM,  $n = 3$ .

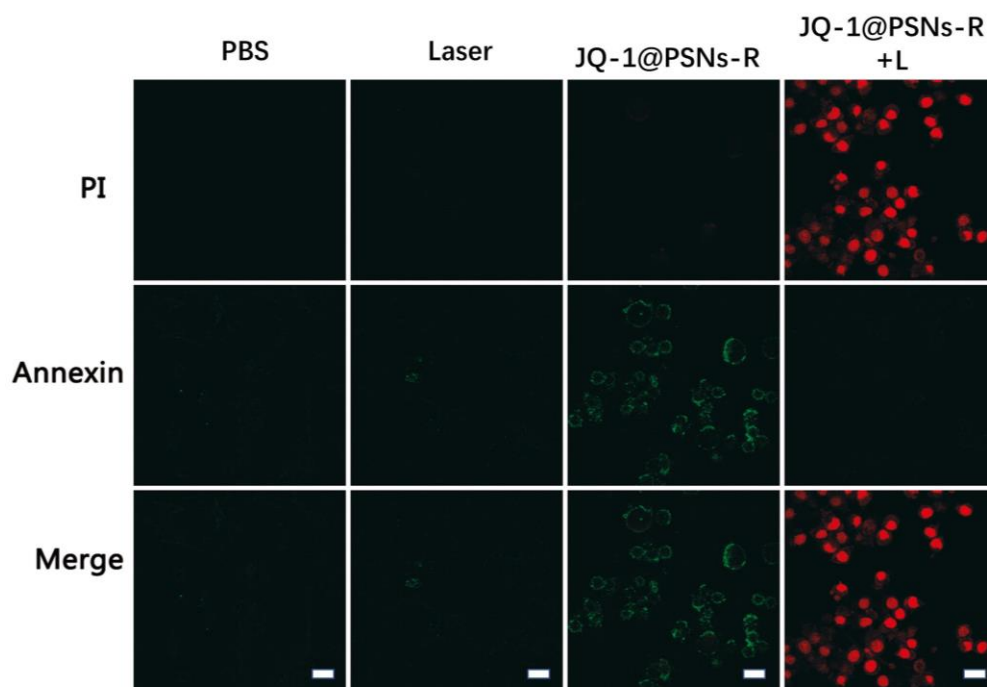

**Figure S7** Photothermal cytotoxicity of JQ-1@PSNs-R. B16F10 cells were incubated in 35 mm confocal dishes for 24 h. After incubation, cells were exposed to JQ-1@PSNs-R for 1 h and irradiated for 5 min with a near-infrared laser (808 nm, 1.18 W/cm<sup>2</sup>). After co-stained by annexin and propidium iodide, the cells were imaged by confocal laser scanning microscopy (Zeiss, Oberkochen, Germany). Scale bar = 10 μm

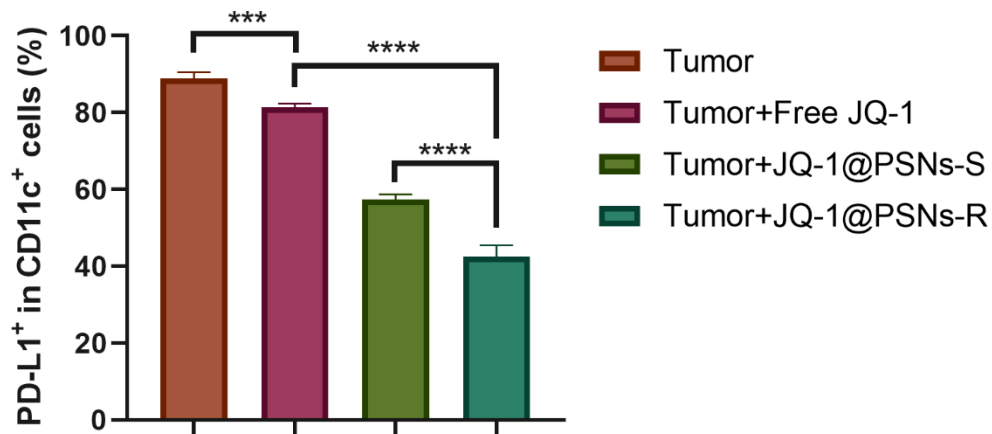

**Figure S8** JQ-1@PSNs-R inhibiting the expression of PD-L1 in BMDCs. After incubated with BMDCs and tumor-related stimulants, the JQ-1@PSNs-R significantly inhibit PD-L1 expression in BMDCs which was much better than that of JQ-1@PSNs-S and free JQ-1. Data were mean  $\pm$  SEM,  $n = 4$  and analyzed by one-way ANOVA, \*\*\* $P < 0.001$  and \*\*\*\* $P < 0.0001$ .

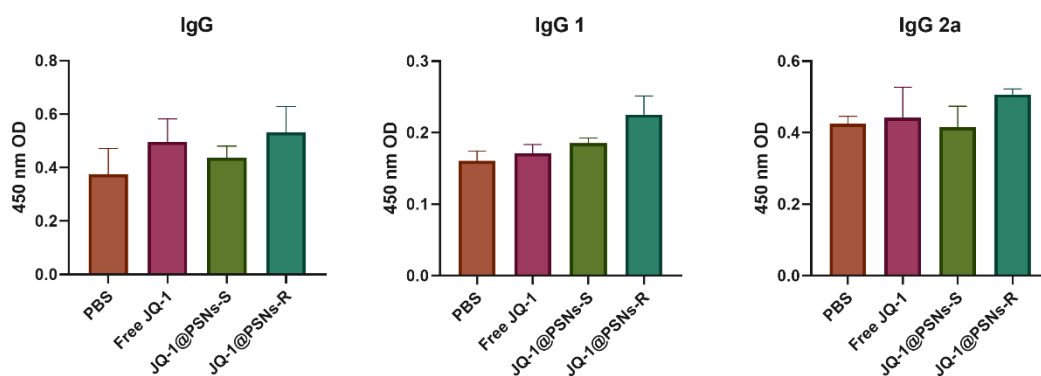

**Figure S9** The antibodies in serum after JQ-1@PSNs-mediated photothermal therapy. Free JQ-1, JQ-1@PSNs-S or JQ-1@PSNs-R were intratumorally injected to mice, and at 3 days after photothermal therapy, mice serum was collected and the antibodies were detected by ELISA kits. Data were mean  $\pm$  SEM,  $n = 3$ .

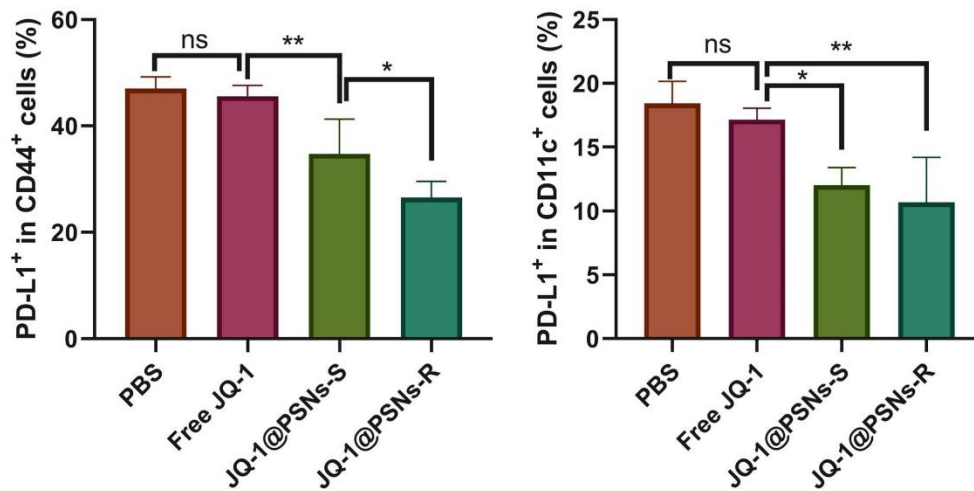

**Figure S10** The expression of PD-L1 in tumor cells and DCs after JQ-1@PSNs-mediated photothermal therapy. Free JQ-1, JQ-1@PSNs-S or JQ-1@PSNs-R were intratumorally injected to mice, and at 3 days after photothermal therapy, tumor tissues were collected and the PD-L1-expressing tumor cells (CD44<sup>+</sup>) and DCs (CD11c<sup>+</sup>) were detected by flow cytometry. Results showed that JQ-1@PSNs-R had a better PD-L1 inhibiting effect than JQ-1@PSNs-S in tumor cells. Data were mean  $\pm$  SEM,  $n = 4$  and analyzed by One-way ANOVA, \* $P < 0.05$ , \*\* $P < 0.01$ . ns, not significant.

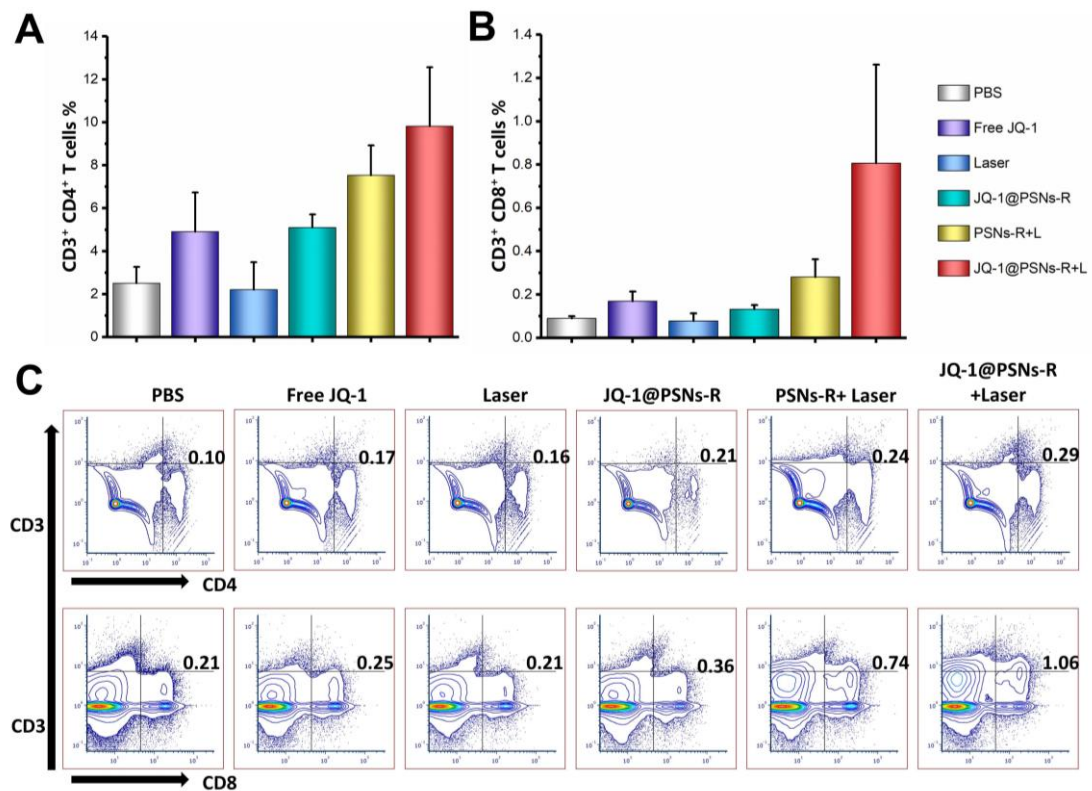

**Figure S11** The proportions of CD4 and CD8 T cells in tumor sites after JQ-1@PSNs-mediated photothermal therapy. At 7 days after photothermal therapy, mice were sacrificed, and the tumor tissues were harvested. The percentage of CD4 T cells and CD8 T cells in tumor sites was measured by flow cytometry. Data were mean  $\pm$  SEM,  $n = 4$ .

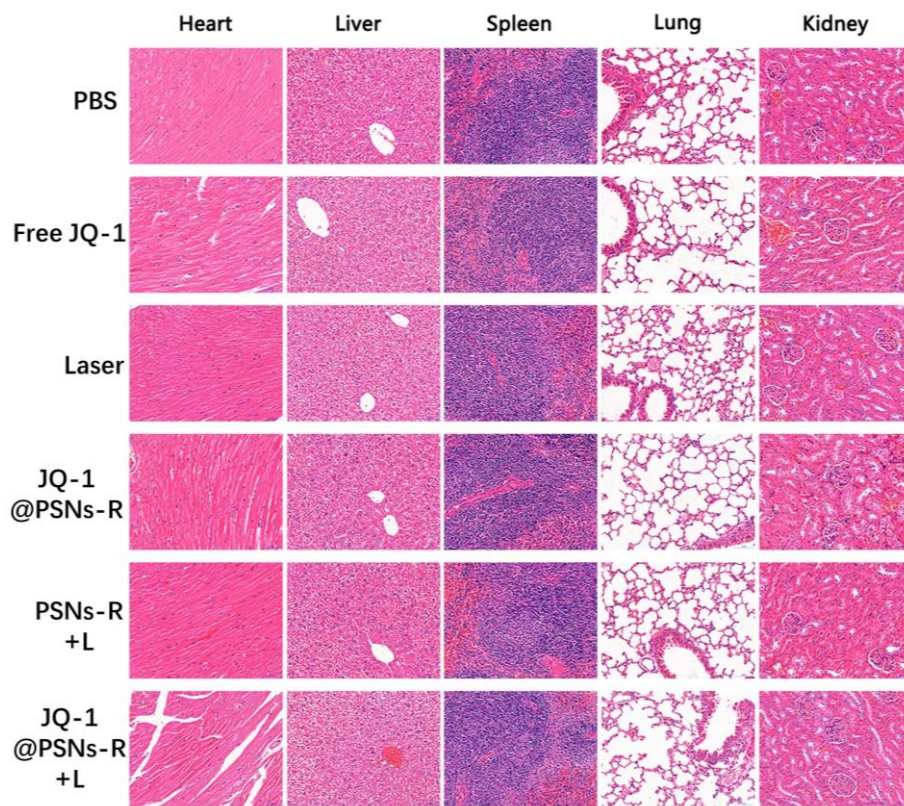

**Figure S12** Histopathology examination after JQ-1@PSNs-mediated photothermal therapy. After therapy, mice were sacrificed on Day 14. Hearts, lungs, livers, spleens and kidneys were collected and stained with hematoxylin and eosin for histological analysis (HE stain,  $\times 400$ ).

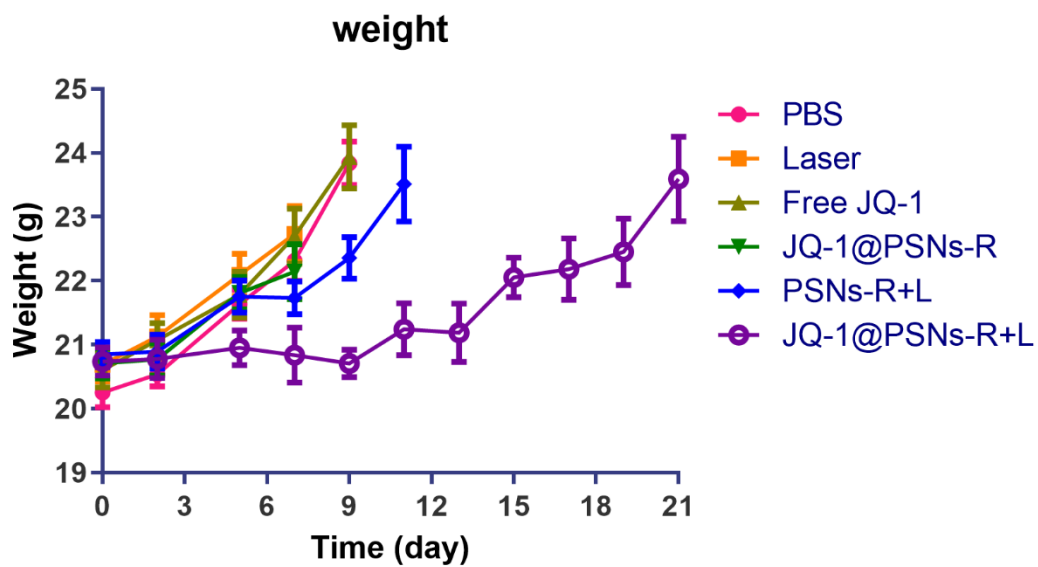

**Figure S13** Mice weight after JQ-1@PSNs-mediated photothermal therapy. For weight, the data were recorded every two days until the first mouse in the group died. Data were mean  $\pm$  SEM,  $n = 8$ .



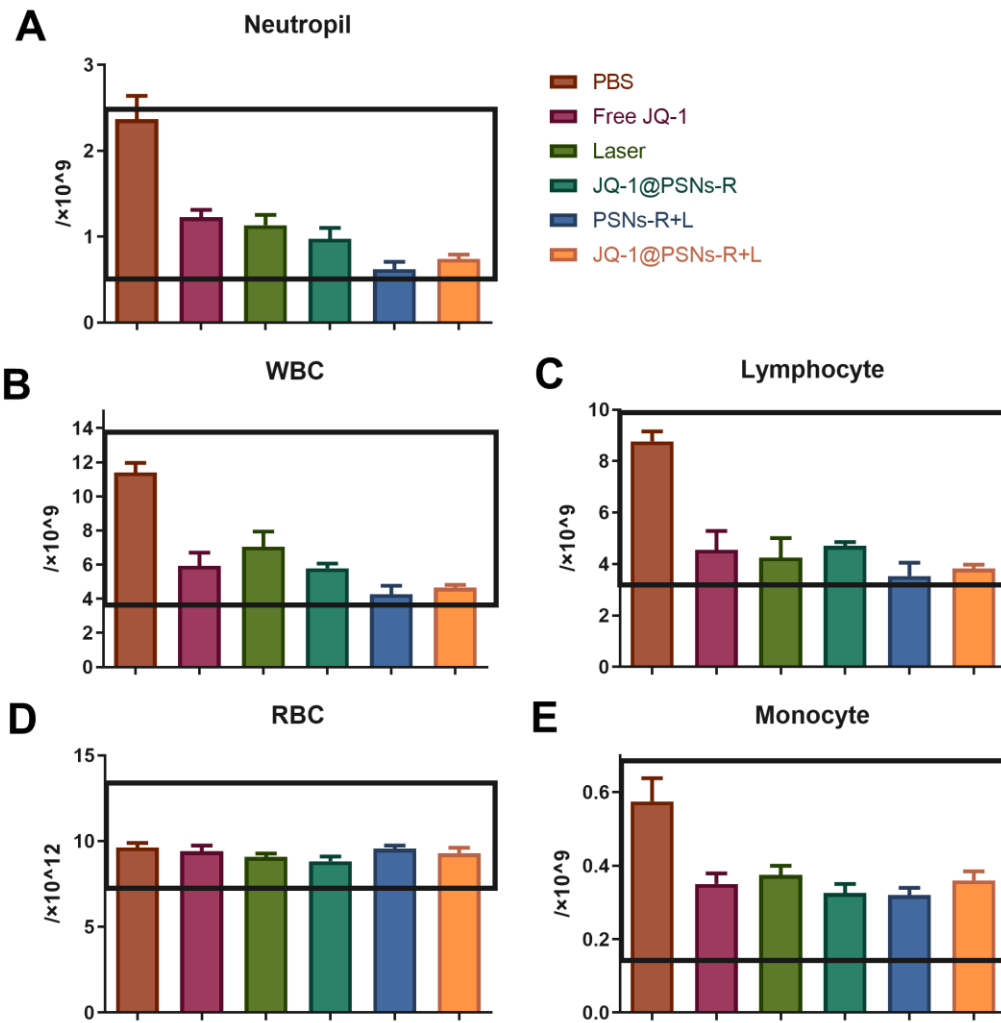

**Figure S14** Analysis of cells in the blood after JQ-1@PSNs-mediated photothermal therapy. Results showed that the cells in blood were within the normal range. Data were mean  $\pm$  SEM,  $n = 4$ .

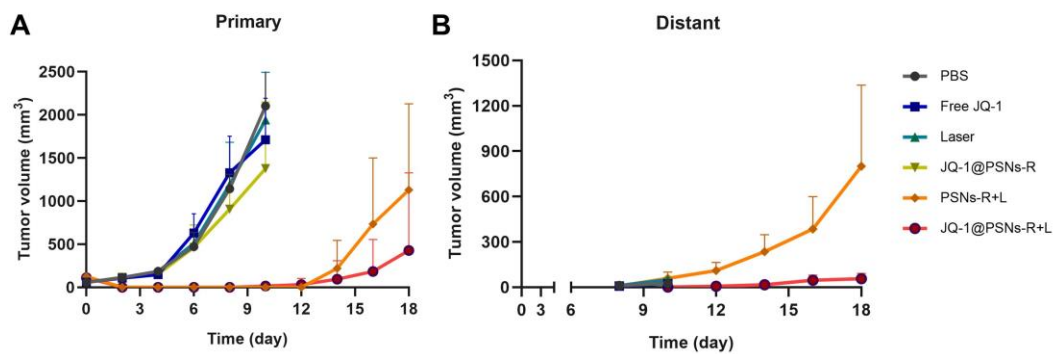

**Figure S15** Inhibition of primary and distant melanoma growth in a model of distant tumor metastasis. Results showed that the bilateral tumor growth of mice in group JQ-1@PSNs-R+L was the slowest, indicating this photothermal immunotherapy led to an effective antitumor immune response. Data were mean  $\pm$  SEM,  $n = 5$ .
